# Supplementary material for: EphB2 activation is required for ependymoma development as well as inhibits differentiation and promotes proliferation of the transformed cell
Source: PubMed Central journal article supplement (PMC4371088; doi:10.1038/srep09248), 2015-03-24

**Title:** EphB2 activation is required for ependymoma development as well as inhibits differentiation and promotes proliferation of the transformed cell

**Authors:** Phylip Chen\*, Nathan Rossi\*, Samuel Priddy, Christopher R. Pierson<sup>#</sup>, Adam W. Studebaker\*, Robert A. Johnson\*<sup>¶</sup>

**Supplemental Figure 1:** (a) Ephrin-B1 and ephrin-B2 western blot of uninfected Ink4a/Arf<sup>(-/-)</sup> STeNSCs (lane 3) or infected with control (pCX4-RedEX; lane 1) or EphB2 expressing (lane 2) retrovirus. (b) Ligand concentration titration experiment: *In vitro* EphB2 activation assay of utNSCs treated with anti-human-IgG (lane 1) or increasing concentration of ephrin-B1 (0.1, 0.25, 0.5, 1.0, 2.0µg/ml; lanes 2-6). (c) EphB2 receptor activation IP/western after ephrin-B(1-3) treatment for 24 or 48hrs.

**Supplemental Figure 2:** Chart of total luciferase activity (total flux (p/s)) over time (days) for mice intracranially implanted with Ink4a/Arf<sup>(-/-)</sup> STeNSCs co-infected with MSCV-Luc and either EphB2, EphB2(K662R) or EphB2(ΔSAM/PDZ). Values in red indicate the last measurement and day of sacrifice before experiment termination at 400 days.

**Supplemental Figure 3:** (a) Chart of the percentage of each neuronal cell type identified by both lineage marker expression and morphology of Ink4a/Arf<sup>(-/-)</sup> STeNSCs infected with nothing, EphB2 (utNSCs) or EphB2(K662R). Graphs depicting the percent of Ink4a/Arf<sup>(-/-)</sup> STeNSCs (b) or EphB2(K662R) infected Ink4a/Arf<sup>(-/-)</sup> STeNSCs (c) differentiated into astrocyte (βIII-tubulin), neuron (S100β) or oligodendrocytes (NG2) after treatment with nothing (untreated), anti-human-IgG, ephrin-B2 or ephrin-B3. Neuronal type determined

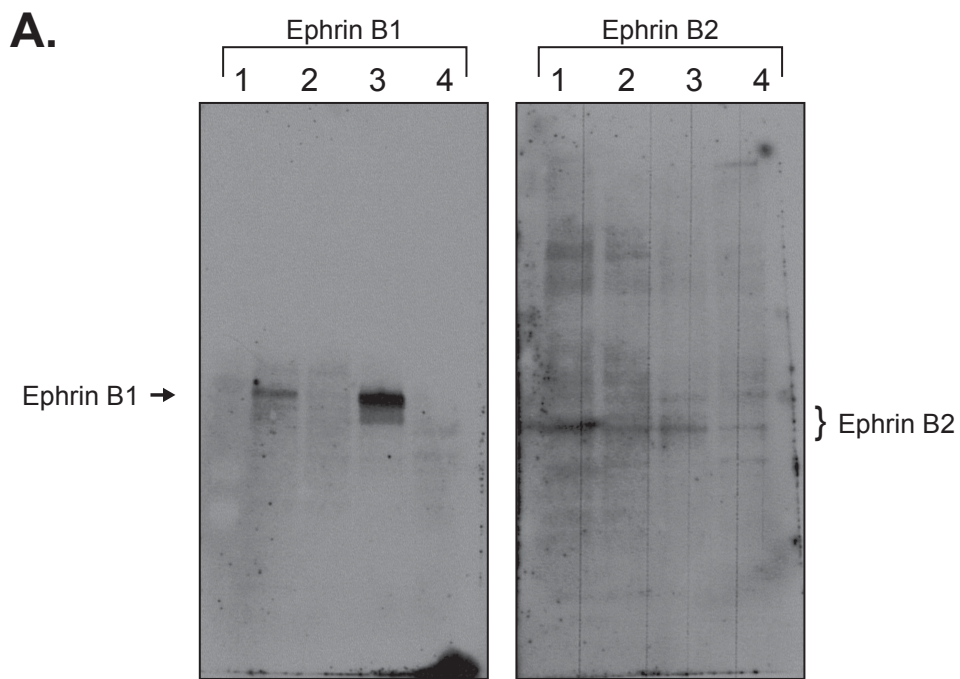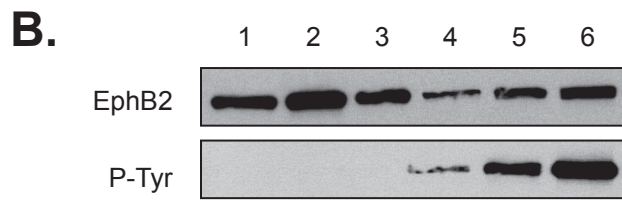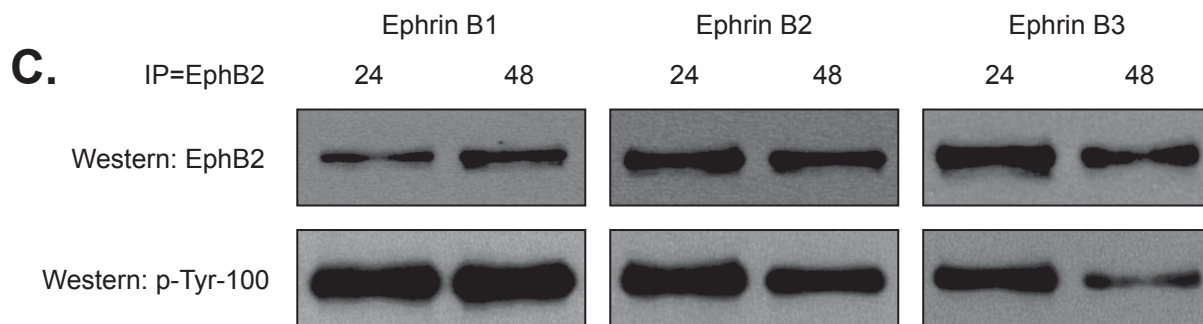

| Days    | 11       | 30       | 121      | 151      | 161      | 169      | 197      | 259      | 372      |
|---------|----------|----------|----------|----------|----------|----------|----------|----------|----------|
| K66R-RA | 1.18E+06 | 4.90E+05 | 8.18E+05 | 9.87E+05 | 1.42E+06 | 9.65E+05 | 7.82E+05 | 1.25E+06 | 2.68E+04 |
| K66R-RM | 4.00E+05 | 2.22E+05 | 2.82E+05 | 4.08E+05 | 2.71E+05 | 2.57E+05 | 2.04E+05 | 2.54E+05 | 2.31E+05 |
| K66R-RP | 3.35E+06 | 9.97E+05 | 3.87E+04 | 3.04E+04 | 3.25E+04 | 3.82E+04 | 3.17E+04 | 1.80E+04 | 4.67E+05 |
| K66R-LA | 2.30E+06 | 6.61E+05 | 7.08E+05 | 9.55E+05 | 1.53E+06 | 1.02E+06 | 7.73E+05 | 9.21E+05 | 1.45E+06 |
| K66R-LP | 4.09E+05 | 1.84E+05 | 4.94E+05 | 3.50E+05 | 5.18E+05 | 3.11E+05 | 4.66E+05 | 5.34E+05 | 1.68E+06 |

| Days        | 11       | 30       | 121      | 151      | 161      | 169      | 185      | 197      | 210      | 234      | 259      | 284      | 298      | 301      | 340      | 354      | 372      |
|-------------|----------|----------|----------|----------|----------|----------|----------|----------|----------|----------|----------|----------|----------|----------|----------|----------|----------|
| dSAM/PDZ-RA | 3.14E+05 | 2.90E+05 | 2.57E+06 | 3.98E+06 | 5.78E+06 | 5.43E+06 | 1.11E+05 | 4.51E+06 | 5.81E+06 | 7.75E+06 | 1.08E+07 |          |          |          |          |          |          |
| dSAM/PDZ-RM | 4.11E+06 | 7.26E+06 | 3.11E+06 | 5.48E+06 | 4.20E+06 | 6.73E+06 | 9.37E+06 | 4.17E+06 | 2.20E+06 | 8.65E+06 | 1.34E+07 | 8.82E+06 |          | 1.51E+07 | 2.06E+07 | 2.55E+07 | 2.65E+07 |
| dSAM/PDZ-RP | 1.81E+06 | 1.41E+06 | 3.55E+06 | 5.03E+06 | 5.88E+06 | 9.22E+06 | 1.60E+07 | 1.07E+07 | 1.23E+07 |          |          |          |          |          |          |          |          |
| dSAM/PDZ-LA | 9.31E+05 | 4.03E+05 | 4.59E+05 | 6.54E+05 | 1.36E+06 | 1.86E+06 | 3.33E+06 | 2.85E+06 | 1.97E+06 | 3.88E+06 | 5.74E+06 | 6.30E+06 | 4.18E+07 |          |          |          |          |
| dSAM/PDZ-LP | 1.22E+06 | 8.71E+05 | 1.42E+06 | 2.34E+06 | 7.21E+06 | 6.60E+06 | 9.99E+06 | 1.28E+07 | 3.49E+07 |          |          |          |          |          |          |          |          |

| Days     | 13       | 30       | 78       | 105      | 137      | 145      | 159      | 173      | 187      | 211      | 250      | 274      | 298      | 337      | 363      |
|----------|----------|----------|----------|----------|----------|----------|----------|----------|----------|----------|----------|----------|----------|----------|----------|
| EphB2-RA | 1.44E+06 | 5.89E+06 | 9.44E+05 | 3.66E+07 | 5.83E+07 | 4.65E+07 | 6.54E+07 | 6.48E+07 | 9.16E+07 | 1.23E+08 | 4.71E+08 |          |          |          |          |
| EphB2-RM | 1.28E+06 | 1.54E+06 | 4.39E+06 | 1.14E+08 | 1.59E+08 | 1.35E+08 | 2.46E+08 | 3.13E+08 | 6.01E+08 |          |          |          |          |          |          |
| EphB2-RP | 1.10E+07 | 5.30E+07 | 8.52E+06 | 6.19E+07 | 1.06E+08 | 5.44E+07 | 8.93E+07 | 1.43E+08 |          |          |          |          |          |          |          |
| EphB2-LA | 1.83E+06 | 1.01E+07 | 1.28E+06 | 1.70E+07 |          |          |          |          |          |          |          |          |          |          |          |
| EphB2-LP | 1.89E+06 | 9.81E+06 | 1.55E+06 | 1.70E+07 | 2.32E+07 | 1.63E+07 | 3.66E+07 | 2.90E+07 | 2.90E+07 | 7.71E+07 | 1.50E+08 | 5.10E+08 | 9.41E+08 | 3.42E+09 | 4.86E+09 |

## A. utNSCs Differentiation Assay (%)

|                     | Untreated | Human IgG-FC | ephrin-B2Fc | ephrin-B3-Fc |
|---------------------|-----------|--------------|-------------|--------------|
| $\beta$ III-Tubulin | 4.781     | 3.669        | 7.953       | 10.21        |
| S100 $\beta$        | 52.69     | 55.55        | 57.46       | 52.26        |
| NG2                 | 37.58     | 35.75        | 35.92       | 38.53        |

## EphB2(K662R) Differentiation Assay (%)

|                     | Untreated | Human IgG-FC | ephrin-B2Fc | ephrin-B3-Fc |
|---------------------|-----------|--------------|-------------|--------------|
| $\beta$ III-Tubulin | 8.045     | 5.62         | 7.946       | 11.09        |
| S100 $\beta$        | 59.06     | 55.18        | 49.29       | 58.59        |
| NG2                 | 36.91     | 41.67        | 31.32       | 43.33        |

## Ink4a/Arf<sup>(-/-)</sup> Differentiation Assay (%)

|                     | Untreated | Human IgG-FC | ephrin-B2Fc | ephrin-B3-Fc |
|---------------------|-----------|--------------|-------------|--------------|
| $\beta$ III-Tubulin | 12.75     | 14.59        | 17.92       | 14.22        |
| S100 $\beta$        | 50.27     | 56.26        | 62.62       | 57.48        |
| NG2                 | 40.45     | 45.87        | 41.98       | 45.95        |

## B.

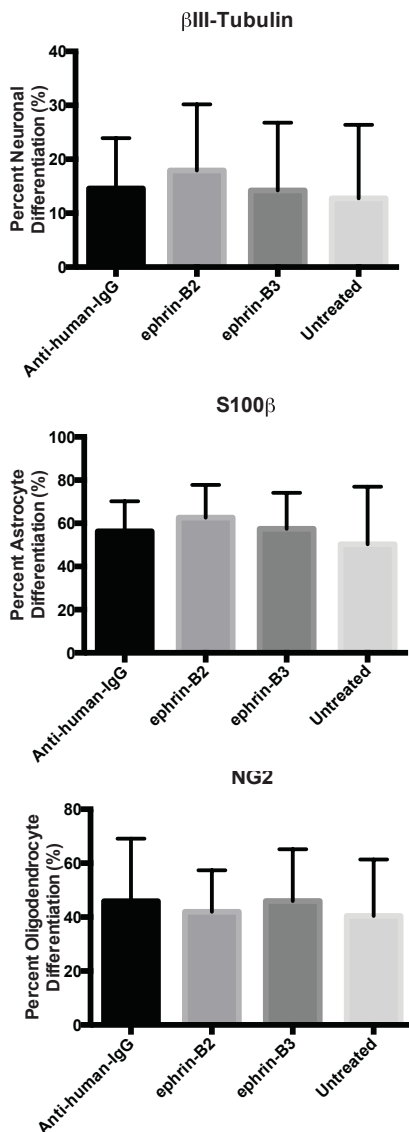

## C.

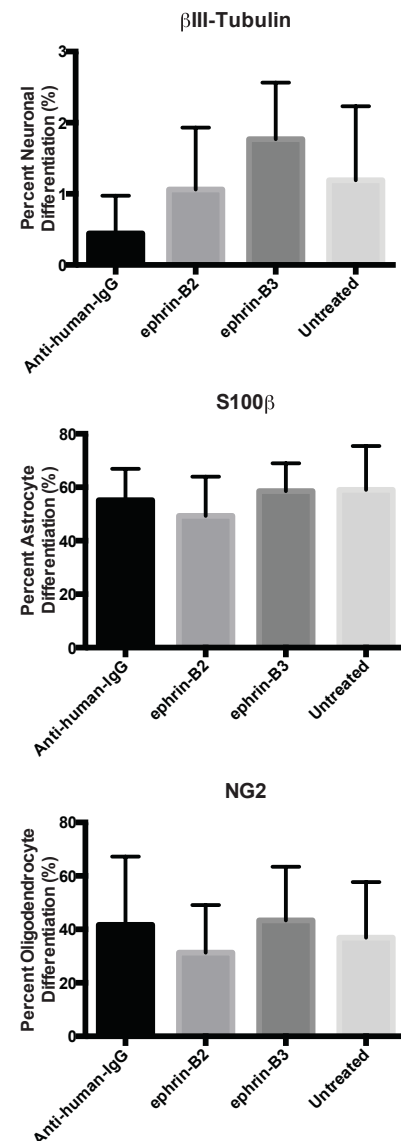

Supplement: srep09248-s1.pdf [file srep09248-s1.pdf]
